# Supplementary material
Source: Springer Nature journal article supplement (https://www.springermedizin.de/resource/supplementary/12888_2013_1631_MOESM6_ESM.pdf/9480994)
Supplement: MOESM6 [file 9480994]

**Additional file 6: Pre- and Post-test OMS-HC Mean Scores: 15-item version**

| <b>Overall: 15 item scale</b>  | <b>n</b> | <b>Total score (95% CI)</b> | <b>Mean score (95% CI)</b> |
|--------------------------------|----------|-----------------------------|----------------------------|
| Pre-test                       | 1448     | 33.4 (33.0-33.7)            | 2.23 (2.20-2.25)           |
| Post-test                      | 830      | 31.2 (30.8-31.7)            | 2.08 (2.05-2.11)           |
| Mean change score (95 % CI)    |          | 1.85 (1.53-2.16)            | 0.12 (0.10-0.14)           |
| Paired samples T-test          | 803      |                             | t=11.4, (p<0.0001) df=802  |
| <b>Attitude</b>                |          |                             |                            |
| Pre-test                       | 1498     | 12.6 (12.4-12.7)            | 1.79 (1.77-1.81)           |
| Post-test                      | 863      | 11.6 (11.4-11.8)            | 1.66 (1.63-1.69)           |
| Mean change score (95 % CI)    |          | 0.78 (0.61-0.94)            | 0.11 (0.09-0.13)           |
| Paired samples T-test          | 841      |                             | t=9.24, (p<0.0001) df=840  |
| <b>Disclosure/help-seeking</b> |          |                             |                            |
| Pre-test                       | 1506     | 11.2 (11.1-11.4)            | 2.81 (2.77-2.84)           |
| Post-test                      | 870      | 10.4 (10.2-10.6)            | 2.60 (2.56-2.65)           |
| Mean change score (95 % CI)    |          | 0.75 (0.61-0.89)            | 0.19 (0.15-0.22)           |
| Paired samples T-test          | 851      |                             | t=10.4, (p<0.0001) df=850  |
| <b>Social Distance</b>         |          |                             |                            |
| Pre-test                       | 1471     | 9.6 (9.5-9.7)               | 1.92 (1.89-1.94)           |
| Post-test                      | 848      | 9.2 (9.1-9.4)               | 1.84 (1.81-1.88)           |
| Mean change score (95 % CI)    |          | 0.27 (0.14-0.41)            | 0.05 (0.03-0.08)           |
| Paired samples T-test          | 830      |                             | t=4.0, (p<0.001) df=829    |

Note: Paired t-tests = based on matched pre and post surveys
